# Supplementary material for: Design of an L-Valine-Modified Nanomicelle-Based Drug Delivery System for Overcoming Ocular Surface Barriers
Source: MDPI journal article supplement (doi:10.3390/pharmaceutics14061277), 2022-06-16
Supplement: s1 [file s1]

**Table S1.** Eye irritation response score standard

| <b>Factors</b>          | <b>Eye stimulation response.</b>                                                                                          | <b>Score</b> |
|-------------------------|---------------------------------------------------------------------------------------------------------------------------|--------------|
| Conjunctival congestion | Clear blood vessels with reddish color                                                                                    | 0            |
|                         | Mildly congested blood vessels with bright red color                                                                      | 1            |
|                         | Congested blood vessels with fuchsia color, not easy to distinguish                                                       | 2            |
|                         | Diffuse hyperemia with fuchsia color, with ciliary hyperemia                                                              | 3            |
| Conjunctival edema      | No edema                                                                                                                  | 0            |
|                         | Mild edema                                                                                                                | 1            |
|                         | Obvious edema, with partial ectropion                                                                                     | 2            |
|                         | Edema to nearly half-closed eyelids                                                                                       | 3            |
|                         | Edema to the extent that the eyelids are half closed                                                                      | 4            |
| Conjunctival secretions | No secretion                                                                                                              | 0            |
|                         | Small amount of secretions                                                                                                | 1            |
|                         | The secretions make the eyelids and eyelashes moist or sticky                                                             | 2            |
|                         | The secretions make the entire eye area moist or sticky                                                                   | 3            |
| Cornea                  | Clear and transparent cornea without turbidity                                                                            | 0            |
|                         | Scattered or diffuse light turbidity, visible iris texture                                                                | 1            |
|                         | Easy to distinguish the translucent area, with blurred iris                                                               | 2            |
|                         | Translucent cornea, blurred iris, and pupil size is barely visible                                                        | 3            |
|                         | Completely cloudy cornea and unrecognizable iris                                                                          | 4            |
| Iris                    | Normal                                                                                                                    | 0            |
|                         | Obviously deepened wrinkles, hyperemia, swelling, and mild hyperemia around the cornea; the pupils still respond to light | 1            |
|                         | Bleeding, visible necrosis, no response to light or one of the reactions                                                  | 2            |
| Highest total score     |                                                                                                                           | 16           |

**Table S2.** Evaluation criteria of eye irritation.

| <b>Score</b> | <b>Evaluation</b>   |
|--------------|---------------------|
| 0~3          | No irritation       |
| 4~8          | Mild irritation     |
| 9~12         | Moderate irritation |
| 13~16        | Severe irritation   |
